# Supplementary material for: Risk of Mercury Ingestion from Canned Fish in Poland
Source: PubMed Central journal article supplement (PMC7764699; doi:10.3390/molecules25245884), 2020-12-12
Supplement: molecules-25-05884-s001.pdf [file molecules-25-05884-s001.pdf]

**Table S1.** The list of fish and seafood products classified according to the recommendations proposed by the Commission Regulation No. 1881/2006 based on the mean levels for certain contaminants in the foodstuffs, which were determined in these products.

| The best choice       |                 | A good choice             |                 | Avoid         |                 |
|-----------------------|-----------------|---------------------------|-----------------|---------------|-----------------|
| Product               | mean Hg [mg/kg] | Product                   | mean Hg [mg/kg] | Product       | mean Hg [mg/kg] |
| Atlantic mackerel     | 0.05            | Halibut                   | 0.24            | King mackerel | 0.73            |
| Cod                   | 0.11            | Carp                      | 0.11            | Marlin        | 0.49            |
| Squid                 | 0.02            | Spanish mackerel          | 0.35            | Swordfish     | 1.00            |
| Crab                  | 0.06            | Tuna white (can)          | 0.35            | Shark         | 0.98            |
| Prawn                 | 0.01            | Tuna white: fresh, frozen | 0.36            | Tuna big-eyed | 0.69            |
| Salmon (can)          | 0.01            |                           |                 |               |                 |
| Salmon: fresh, frozen | 0.02            |                           |                 |               |                 |
| Mollusc               | 0.01            |                           |                 |               |                 |
| Pollock               | 0.03            |                           |                 |               |                 |
| Sardine               | 0.01            |                           |                 |               |                 |
| Herring               | 0.08            |                           |                 |               |                 |
| Tuna light (can)      | 0.13            |                           |                 |               |                 |

**Table S2.** A brief review of the literature on the mercury content of canned fish [mg/kg].

| Total mercury [mg/kg]                                                                                                                                   | Sample                                                                      | MeHg [mg/kg]                                                                                         | Additional information                                                                                                                    | PTWIs                                                                                                                                   | Reference |
|---------------------------------------------------------------------------------------------------------------------------------------------------------|-----------------------------------------------------------------------------|------------------------------------------------------------------------------------------------------|-------------------------------------------------------------------------------------------------------------------------------------------|-----------------------------------------------------------------------------------------------------------------------------------------|-----------|
| Range: 0.079 – 0.315; mean 0.177                                                                                                                        | Canned tuna (n = 40)                                                        | Range: 0.071 – 0.268, mean: 0.144 (mean MeHg/Hg: 80.6%)                                              | Different brands from the Persian Gulf (10 in total), Teheran, Iran                                                                       | Not determined                                                                                                                          | [9]       |
| Range: < 0.01 – 0.08 (mackerel, n = 84); range: 0.01 – 0.04 (sardine, n = 75); range: 0.01 – 0.03 (pilchards, n = 6); range: 0.12 – 0.20 (tuna, n = 15) | Canned fish (n = 180)                                                       | Not determined                                                                                       | Local and imported brands, 28 brands of mackerel, 25 brands of sardines, 2 brands of pilchards, 5 brands of tuna, Kumasi, Ghana           | Max. for Nampa tuna (0.2 µg/g), adult 60 kg has to eat 1500 g (150 g per can, approx. 10 cans) in order to accumulate 300 µg of mercury | [19]      |
| They assumed that the total mercury concentration found in the fish species analysed is actually methylmercury                                          | Samples from fresh, frozen and canned fish and shellfish products (n = 485) | Median range for canned products 0.0 (clam, frigate, mussel, octopus, sardine, squid) – 0.222 (tuna) | 11 species of canned products, Granada, Spain.                                                                                            | For a person weighing 60 kg: 63.63 µg/week                                                                                              | [20]      |
| Range:<br>Light tuna: 0.205 - 0.594<br>White tuna: 0.276 - 0.558<br>Skipjack: 0.299 - 0.322<br>Frigate tuna: 0.182 - 0.257                              | Canned tuna (n = 36)                                                        | Not determined                                                                                       | The most popular brands in Spain. Four type of tuna: light tuna, white tuna, skipjack, frigate tuna, Madrid (32) and Cartagena (4), Spain | Not determined                                                                                                                          | [21]      |

|                                                                                                                                                                                                                                                                                                                                                                                                                                                                                                                                |                                  |                       |                                                                                                                                                                                                                   |                                                                                                                                                                                                                                                                                                                 |             |
|--------------------------------------------------------------------------------------------------------------------------------------------------------------------------------------------------------------------------------------------------------------------------------------------------------------------------------------------------------------------------------------------------------------------------------------------------------------------------------------------------------------------------------|----------------------------------|-----------------------|-------------------------------------------------------------------------------------------------------------------------------------------------------------------------------------------------------------------|-----------------------------------------------------------------------------------------------------------------------------------------------------------------------------------------------------------------------------------------------------------------------------------------------------------------|-------------|
| <p>Range: 0.0378-0.5243<br/>(mean: 0.2087)</p> <p>Albacore (mean 0.326<br/>and range 0.174 – 0.507,<br/>n = 49)</p> <p>Skipjack (mean 0.132<br/>and range 0.057 - 0.305,<br/>n = 21)</p> <p>Yellowfin (mean 0.066<br/>and range 0.046 –<br/>0.095, n = 14)</p> <p>Not specified (mean<br/>0.095 and range 0.016 -<br/>0.237, n = 72)</p> <p>Total (mean 0.170 and<br/>range 0.016 – 0.507, n =<br/>156)</p> <p>Range 0.02 - 0.47;<br/>mean 0.123 (domestic<br/>brands); range 0.02 -<br/>0.11; 0.047 (imported<br/>brands)</p> | <p>Canned tuna<br/>(n = 50)</p>  | <p>Not determined</p> | <p>Popular brands of<br/>canned tuna from the<br/>Morocco</p>                                                                                                                                                     | <p>For a person<br/>weighing 60 kg:<br/>0.67µg/kg<br/>b.w./week</p>                                                                                                                                                                                                                                             | <p>[22]</p> |
| <p>Skipjack tuna fish:<br/>Range 0.117 - 0.157<br/>and mean 0.115 in<br/>the white muscle;<br/>range 0.133 - 0.171<br/>and mean 0.124 in<br/>the dark muscle.</p>                                                                                                                                                                                                                                                                                                                                                              | <p>Canned tuna<br/>(n = 30)</p>  | <p>Not determined</p> | <p>Domestic and<br/>imported brands (10 in<br/>total), Teheran, Iran</p>                                                                                                                                          | <p>Not determined</p>                                                                                                                                                                                                                                                                                           | <p>[24]</p> |
| <p>Skipjack tuna fish:<br/>Range 0.117 - 0.157<br/>and mean 0.115 in<br/>the white muscle;<br/>range 0.133 - 0.171<br/>and mean 0.124 in<br/>the dark muscle.</p>                                                                                                                                                                                                                                                                                                                                                              | <p>Canned tuna<br/>(n = 30)</p>  | <p>Not determined</p> | <p>The comparison was<br/>made among mercury<br/>content in raw, cooked<br/>and canned fish. Also the<br/>differentiation was made<br/>between Hg content in<br/>white and dark muscles,<br/>Aveiro, Portugal</p> | <p>It is possible to<br/>consume 10<br/>cans of white<br/>muscle per<br/>week (78 g<br/>each can)<br/>without<br/>exceeding the<br/>RfD of JECFA<br/>and 8 cans<br/>when<br/>considering<br/>the USEPA<br/>RfD. For the<br/>dark muscle,<br/>the number of<br/>canned tuna<br/>meals per<br/>week is lower.</p> | <p>[25]</p> |
| <p>Mean for Brand 1:<br/>0.777 ± 0.320</p> <p>Mean for Brand 2:<br/>0.541 ± 0.114</p> <p>Mean for Brand 3:<br/>0.550 ± 0.199</p>                                                                                                                                                                                                                                                                                                                                                                                               | <p>Canned tuna<br/>(n = 150)</p> | <p>Not determined</p> | <p>Three national brands: B1<br/>(n = 54); B2 (n = 46); B3 (n<br/>= 55).</p> <p>B1 chunk white (n = 10);<br/>B1 chunk light (n = 15)<br/>B3 oil (n = 10);<br/>B3 water (n = 10), Las<br/>Vegas, USA</p>           | <p>For 25-kg<br/>child: - 75g<br/>tuna<br/>containing 0.5<br/>mg/kg Hg per<br/>15 days<br/>- 75g tuna<br/>containing</p>                                                                                                                                                                                        | <p>[26]</p> |

Mean for Brand 1  
(chunk light):  $0.264 \pm 0.006$

Mean for Brand 1  
(chunk white):  $0.502 \pm 0.086$ ;

Mean for Brand 3  
(oil):  $0.807 \pm 0.298$ ;

Mean for Brand 3  
(water):  $0.579 \pm 0.329$

$0.777 \text{ mg/kg}$   
Hg per 23.3  
days

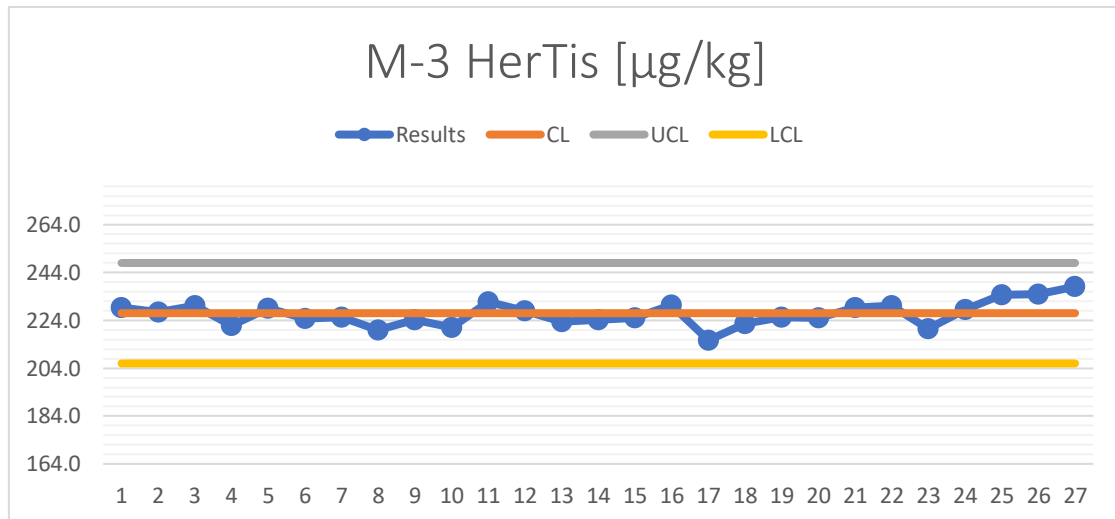

**Figure S1.** Shewhart limit chart for mercury content in CRM M-3 HerTis among the measurement days, where *centre line* (CL) is a certified content of mercury, *upper control limit* (UCL) is a certified content of mercury + an uncertainty, *lower control limit* (LCL) is a certified content of mercury - an uncertainty.

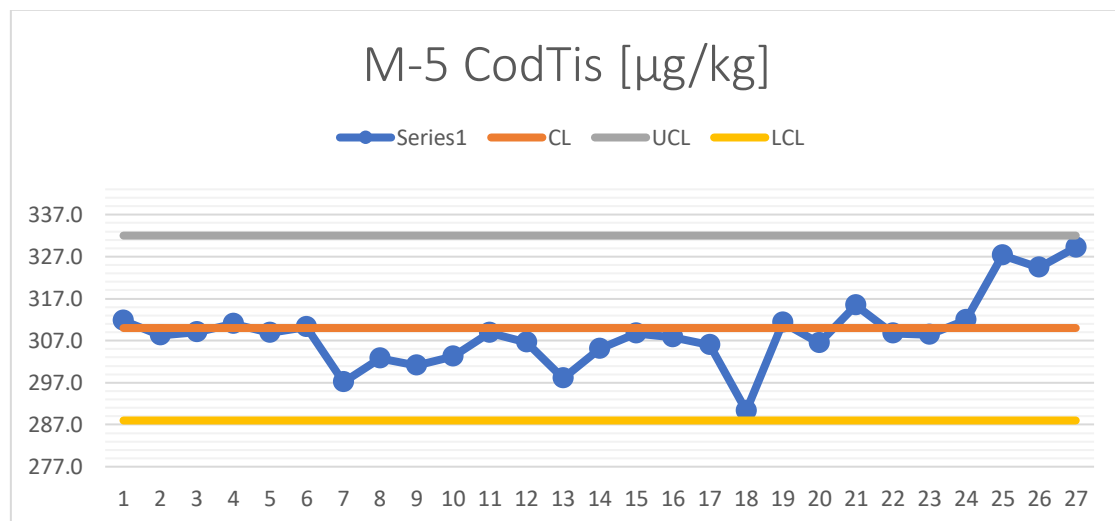

**Figure S2.** Shewhart limit chart for mercury content in CRM M-5 CodTis among the measurement days, where *centre line* (CL) is a certified content of mercury, *upper control limit* (UCL) is a certified content of mercury + an uncertainty, *lower control limit* (LCL) is a certified content of mercury - an uncertainty.

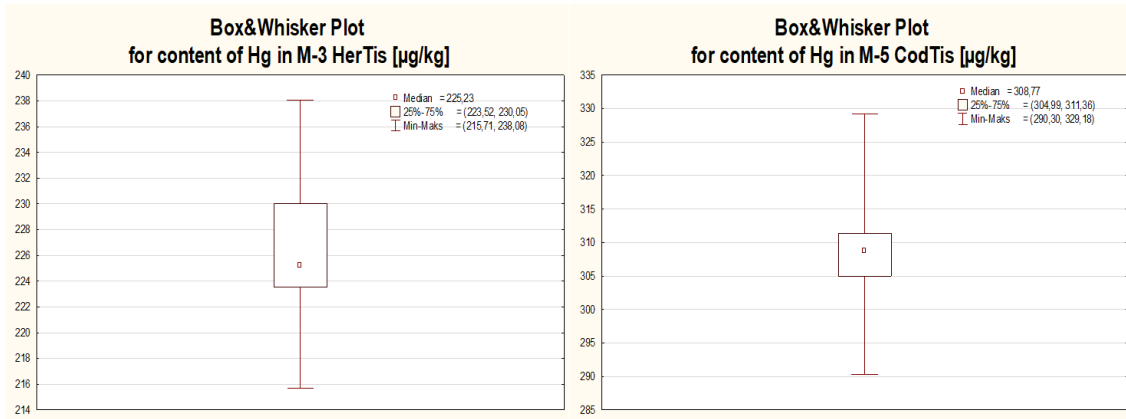

**Figure S3.** Box&Whisker Plot for the content of Hg in the certified reference material of M-3 Herring Tissue (n = 27) and M-5 Cod Tissue (n = 27) [ $\mu\text{g}/\text{kg}$ ].

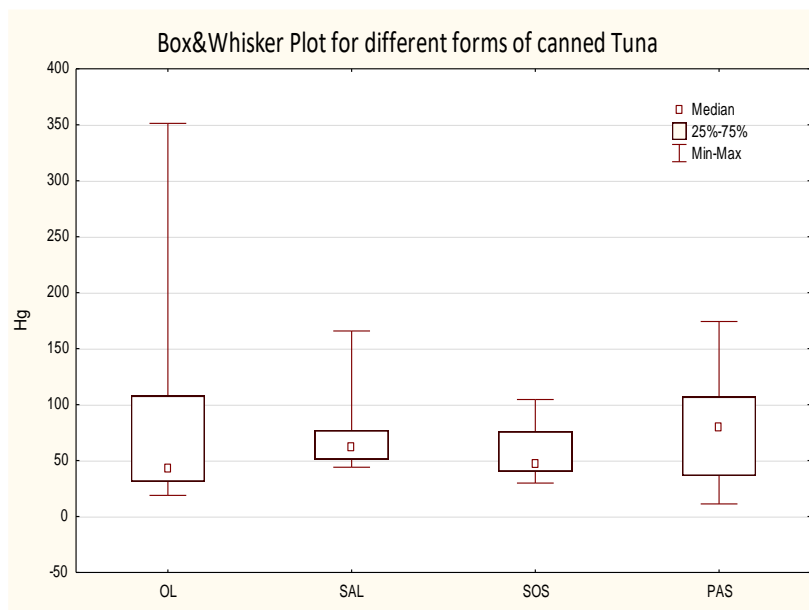

**Figure S4.** Box & Whisker Plot for content of Hg for canned tuna packed in different matrices (OL- oil, n = 18, median = 43.2; SAL- salads, n = 15, median = 62.6; SOS - own juice and sauces, n = 15, median = 47; PAS - pastes, n = 9, median = 79.2; total n = 57) [ $\mu\text{g}/\text{kg}$ ].

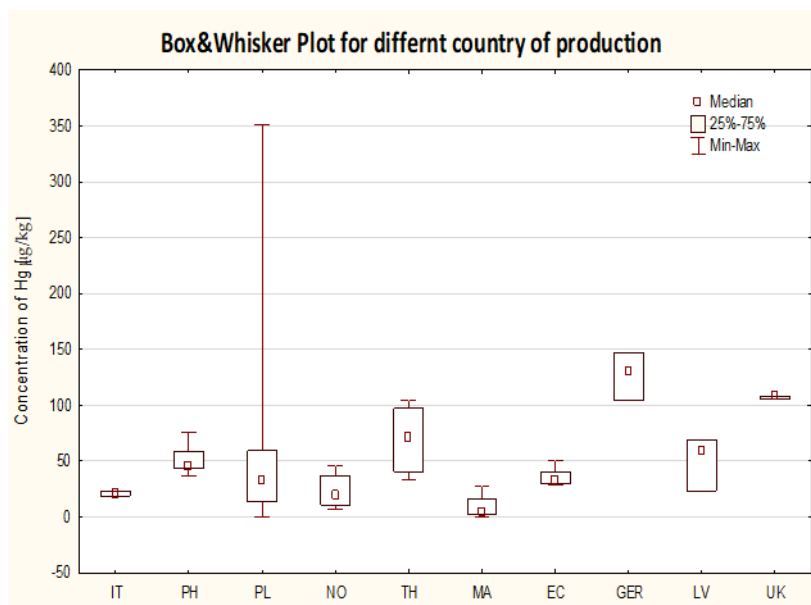

**Figure S5.** Box & Whisker Plot for content of Hg for canned fish produced in different countries (IT-Italy, n = 3, median = 21.4; PH-Philippines, n = 9, median = 45.6; PL-Poland, n= 192, median = 33.4; NO-Norway, n = 12, median = 19.7; TH-Thailand, n = 9, median = 71.4; MA-Morocco, n = 12; median = 4.6; EC-Ecuador, n = 6; median = 33.2; GER-Germany, n = 3; median = 130; LV-Latvia, n = 3, median = 59.8; UK-United Kingdom, n = 3; median = 107; total n = 252) [ $\mu\text{g}/\text{kg}$ ].

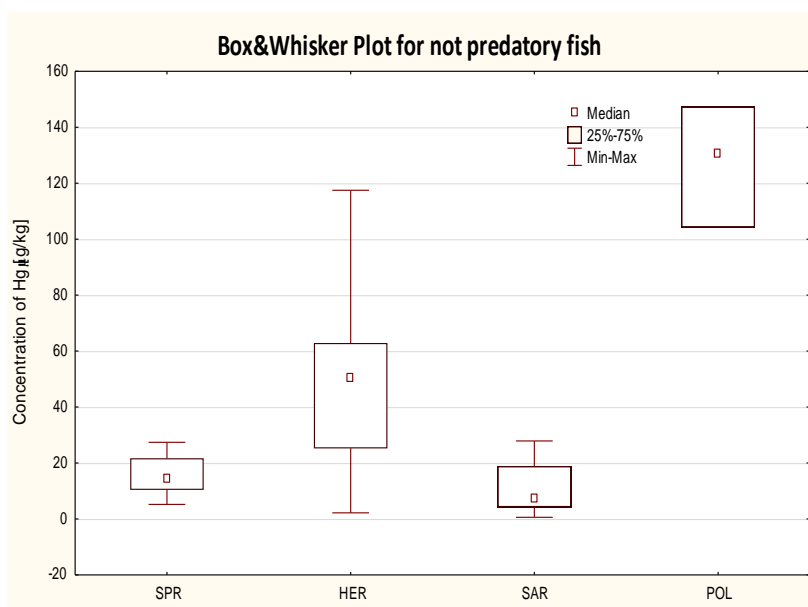

**Figure S6.** Box & Whisker Plot for content of Hg for not predatory fish (SPR – sprat, n = 27, median = 14.6; HER – herring, n= 54, median = 50.6; SAR – sardine, n = 21, median = 7.3; POL – pollock, n = 3, median = 130; total n = 105) [ $\mu\text{g}/\text{kg}$ ].

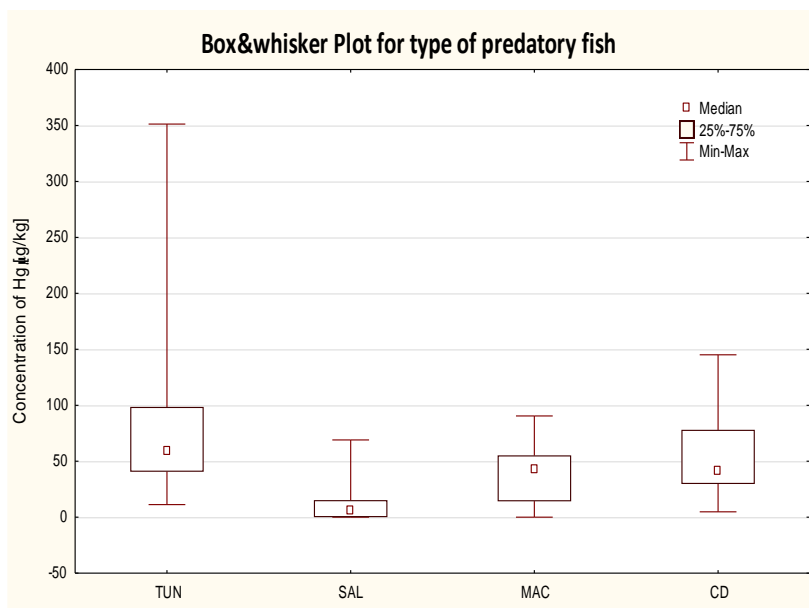

**Figure S7.** Box & Whisker Plot for content of Hg for type of predatory fish (TUN – tuna, n = 57, median = 58.8; SAL – salmon, n= 24, median = 6.65; MAC – mackerel, n = 42, median = 45.8; CD – cod, n = 24, median = 41; total n = 147) [µg/kg].

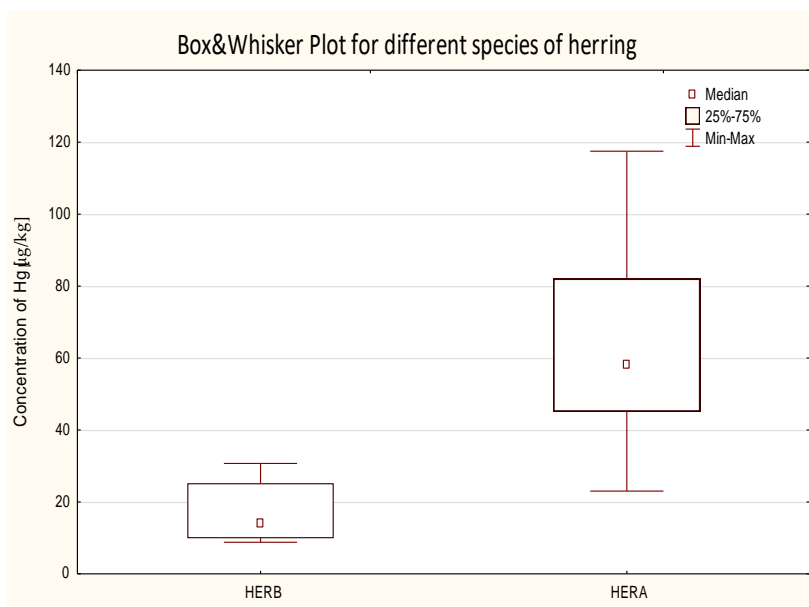

**Figure S8.** Box & Whisker Plot for content of Hg for species of herring (HERB – Baltic herring, n = 9, median = 13.9; HERA – Atlantic herring, n = 33, median = 58.2; total n = 33) [µg/kg].

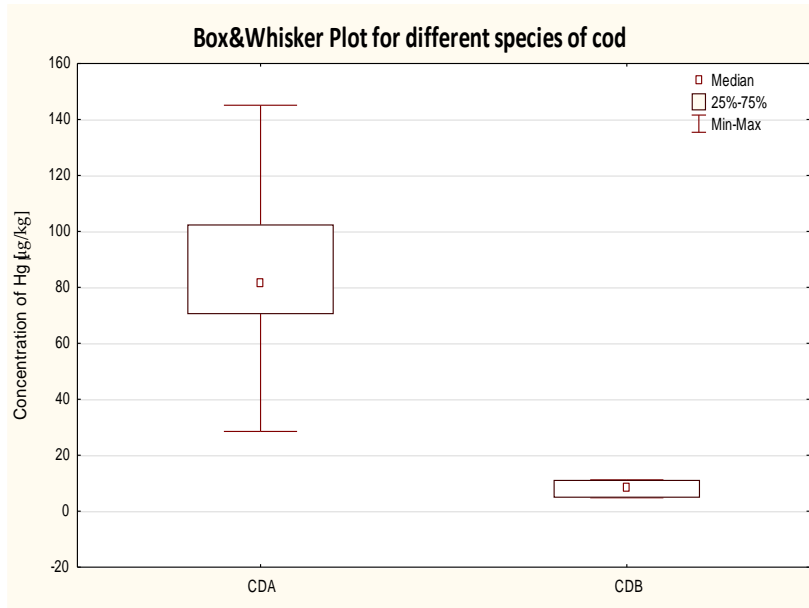

**Figure S9.** Box & Whisker Plot for content of Hg for two species of cod (CDA – Atlantic cod, n = 9, median = 81.3; CDB – Black cod, n = 3, median = 8.6; total n = 12) [ $\mu\text{g}/\text{kg}$ ].

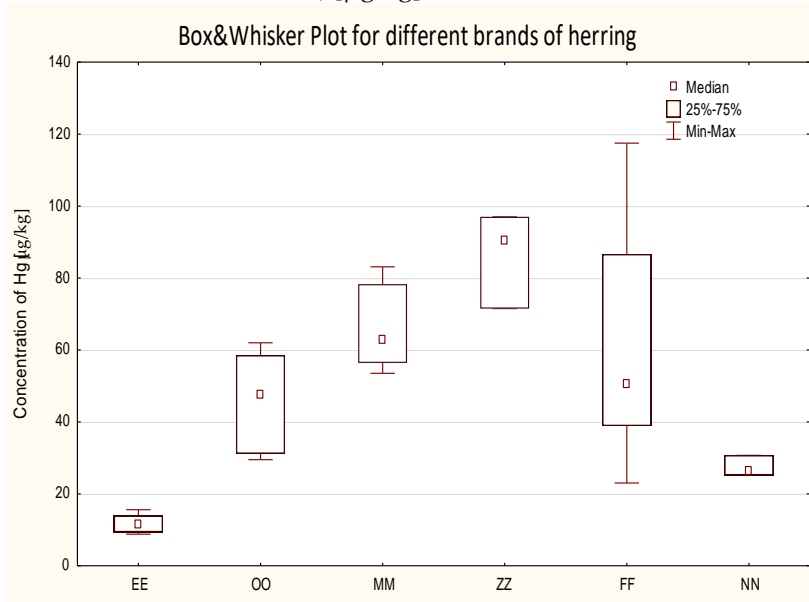

**Figure S10.** Box & Whisker Plot for content of Hg for considered brands of herring (EE, n = 6, median = 11.3; OO, n = 6, median = 47.4; MM, n = 9, median = 62.9; ZZ, n = 3, median = 90.6; FF, n = 15, median = 50.5; NN, n = 3, median = 26.5; total n = 42) [ $\mu\text{g}/\text{kg}$ ].

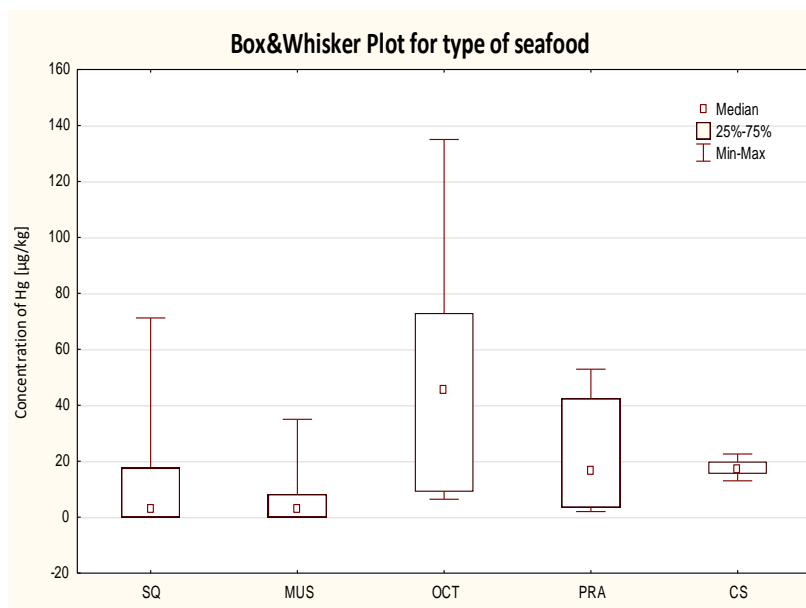

**Figure S11.** Box & Whisker Plot for content of Hg for type of seafood (SQ – squid, n = 51, median = 2.8; MUS – mussel, n = 18, median = 3.16; OCT – octopus, n = 6, median = 45.5; PRA – prawn, n = 15, median = 16.4; CS – crab sticks, n = 15, median = 17.4; total n = 108) [ $\mu\text{g}/\text{kg}$ ].

#### References for supplementary materials:

9. Dezfouli, A., Salar-Amolia, J., Ali-Esfahania, T., Hosseini, H., Ghanatic, K., Evaluating Total Mercury and Methyl Mercury Contents in Canned Tuna Fish of the Persian Gulf, *Iranian Journal of Pharmaceutical Research*, **2018**, 17(2); pp. 585-592.
19. Okyere, H., Voegborolo, R.B., Agorku, S.E., Human exposure to mercury, lead and cadmium through consumption of canned mackerel, tuna, pilchard and sardine, *Food chemistry*, **2015**, pp. 331-335.
20. Olmedo, P., Pla, A., Hernández, A.F., Barbier, F., Ayouni, L., Gil, F., Determination of toxic elements (mercury, cadmium, lead, tin and arsenic) in fish and shellfish samples. Risk assessment for the consumers, *Environment International*, **2013**, 59; pp. 63–72.
21. González-Estecha, M., Martínez-García, M.J., Fuentes-Ferrer, M., BodasPinedo, A., Calle-Pascual, A., Ordóñez-Iriarte, J.M., et al., Mercury in canned tuna in Spain. Is light tuna really light? *Food Nutr Sci*, **2013**, 4; pp. 48–54
22. Adil, C., Mustapha, H., Abdeljalil, B., Taoufiq, B., Heavy metals content of canned tuna fish: estimated weekly intake, *Mor. J. Chem.*, **2015**, 3(1); pp. 152-156.
23. Dabeka, R. W., Mckenzie, A. D., Forsyth, D. S., Total mercury in canned tuna sold in Canada in 2006, *Food Additives & Contaminants*, 7(2); pp. 110-114. <https://doi.org/10.1080/19393210.2013.856036>.
24. Andayesh, S., Hadiani, M. R., Mousavi, Z., Shoeibi, S., Lead, cadmium, arsenic and mercury in canned tuna fish marketed in Tehran, Iran, *Food Additives & Contaminants*, **2015**, 8; pp. 93-98, <https://doi.org/10.1080/19393210.2014.993430>.
25. Vieira, H.C., Bordalo, M.D., Morgado, F., Soares, A.M.V.M., Abreu, S.N., Mercury content in the white and dark muscle of Skipjack tuna (*Katsuwonus pelamis*) along the canning process: Implications to the consumers, *Journal of Food Composition and Analysis*, **2017**, 56; pp 67-72.
26. Gerstenberger, S.L., Martinson, A., Kramer, J.L., An evaluation of mercury concentrations in three brands of canned tuna, *Environmental Toxicology and Chemistry*, **2009**, 29(2); pp. 237-242. <https://doi.org/10.1002/etc.32>.
